# Supplementary material for: Estimating the Clinical and Economic Impact of Introducing a New Antibacterial into Greek Clinical Practice for the Management of Hospital-Acquired Infections with Limited Treatment Options
Source: Springer Nature journal article supplement (doi:10.1007/s40121-022-00743-4), 2022-12-21
Supplement: MOESM1 [file 23849700]

## Supplementary material

**Manuscript Title:** Estimating the Clinical and Economic Impact of Introducing a New Antibacterial into Greek Clinical Practice for the Management of Hospital acquired Infections with Limited Treatment Options

Running heading: Clinical and economic value of introducing a new antimicrobial in Greece.

## Journal

Infectious Diseases and Therapy

**Authors:** *Myrto Barmpouni<sup>1</sup>, Jason Gordon<sup>2</sup>, Ryan Miller<sup>2</sup>, Clive Pritchard<sup>2</sup>, James Dennis<sup>2</sup>, Vassilis Grammelis<sup>1</sup>, Aris Rousakis<sup>1</sup>, Kyriakos Souliotis<sup>3</sup>, Garyphallia Poulakou<sup>4</sup>, George L. Daikos<sup>5</sup>, Amer Al-Taie<sup>6</sup>*

<sup>1</sup>Pfizer Hellas, Athens, Greece

<sup>2</sup>Health Economics and Outcomes Research Ltd. Cardiff, UK

<sup>3</sup>Faculty of Social and Political Sciences, University of Peloponnese, Corinth, Greece; Health Policy Institute, Athens, Greece

<sup>4</sup>3rd Department of Medicine, National and Kapodistrian University of Athens, School of Medicine, Sotiria General Hospital, Athens, Greece

<sup>5</sup>First Department of Medicine, School of Medicine, National and Kapodistrian University of Athens

<sup>6</sup>Pfizer R&D, Tadworth, UK

## Corresponding author:

Name: Amer Al-Taie

Address: Pfizer Ltd, Dorking Road, Tadworth, KT20 7NT

Email: Amer.Taie@Pfizer.com

Supplementary Table 1. Model input variation of the dynamic AMR model

| Model input                        |             | Variation                                                                                                                                                                                                                                                                                                                                                                         |
|------------------------------------|-------------|-----------------------------------------------------------------------------------------------------------------------------------------------------------------------------------------------------------------------------------------------------------------------------------------------------------------------------------------------------------------------------------|
| Pathogen                           |             | <i>E.coli, Klebsiella spp., P.aeruginosa</i>                                                                                                                                                                                                                                                                                                                                      |
| Treatment sequence                 |             | Treatment 1 -> Treatment 2,<br>Treatment 2 -> Treatment 1,<br>Treatment 1 -> Treatment 2 -> New antimicrobial,<br>Treatment 2 -> Treatment 1 -> New antimicrobial,<br>Treatment 1 -> New antimicrobial -> Treatment 2,<br>Treatment 2 -> New antimicrobial -> Treatment 1,<br>New antimicrobial -> Treatment 1 -> Treatment 2,<br>New antimicrobial -> Treatment 2 -> Treatment 1 |
| Diversity enablement               |             | No diversification,<br>Equal split between two treatments at first-line,<br>Equal split between three treatments at first-line                                                                                                                                                                                                                                                    |
| LOS (given successful treatment)   |             | 5 days, 7 days, 9 days                                                                                                                                                                                                                                                                                                                                                            |
| LOS (given unsuccessful treatment) |             | 2 days, 3 days, 4 days                                                                                                                                                                                                                                                                                                                                                            |
| Baseline resistance                | Treatment 1 | 0%, 10%, 20%, 30%                                                                                                                                                                                                                                                                                                                                                                 |
|                                    | Treatment 2 | 0%, 10%, 20%, 30%                                                                                                                                                                                                                                                                                                                                                                 |
|                                    | Treatment 3 | 0%, 10%, 20%, 30%                                                                                                                                                                                                                                                                                                                                                                 |
| Treatment efficacy                 | Treatment 1 | 80%, 90%, 100%                                                                                                                                                                                                                                                                                                                                                                    |
|                                    | Treatment 2 | 80%, 90%, 100%                                                                                                                                                                                                                                                                                                                                                                    |
|                                    | Treatment 3 | 80%, 90%, 100%                                                                                                                                                                                                                                                                                                                                                                    |
| <i>LOS: length of stay</i>         |             |                                                                                                                                                                                                                                                                                                                                                                                   |

Supplementary Table 2. Value of New Antibacterial Model - weighted input calculations

| Indication                                                                                                                                                                                                                                                                                                                                                                                                                              | Value           | Source                                     |
|-----------------------------------------------------------------------------------------------------------------------------------------------------------------------------------------------------------------------------------------------------------------------------------------------------------------------------------------------------------------------------------------------------------------------------------------|-----------------|--------------------------------------------|
| <b>Daily cost of hospitalisation</b>                                                                                                                                                                                                                                                                                                                                                                                                    |                 |                                            |
| cUTI with LTO                                                                                                                                                                                                                                                                                                                                                                                                                           | € 195.50        | GG 946 B'/27.3.2012 (Y23M)                 |
| cIAI with LTO                                                                                                                                                                                                                                                                                                                                                                                                                           | € 281.80        | GG 946 B'/27.3.2012 (II07M)                |
| HAP/VAP with LTO                                                                                                                                                                                                                                                                                                                                                                                                                        | € 269.50        | GG 946 B'/27.3.2012 (P24M $\alpha$ )       |
| Other infections with LTO                                                                                                                                                                                                                                                                                                                                                                                                               | € 328.15        | GG 946 B'/27.3.2012 (A22M $\alpha$ + P20A) |
| Weighted value*                                                                                                                                                                                                                                                                                                                                                                                                                         | <b>€ 267.25</b> | Calculation                                |
| <b>Utility (resolution of infection)</b>                                                                                                                                                                                                                                                                                                                                                                                                |                 |                                            |
| cUTI with LTO                                                                                                                                                                                                                                                                                                                                                                                                                           | 0.68            | Ernst et al.[1]                            |
| cIAI with LTO                                                                                                                                                                                                                                                                                                                                                                                                                           | 0.6             | Brasel et al.[2]                           |
| HAP/VAP with LTO                                                                                                                                                                                                                                                                                                                                                                                                                        | 0.58            | Beusterien et al.[3]                       |
| Other infections with LTO                                                                                                                                                                                                                                                                                                                                                                                                               | 0.6             | Brasel et al.[2]                           |
| Weighted value*                                                                                                                                                                                                                                                                                                                                                                                                                         | <b>0.62</b>     | Calculation                                |
| <p><i>cIAI: complicated intra-abdominal infection; cUTI: complicated urinary tract infection; HAP: hospital-acquired pneumonia; LOT: limited treatment options; VAP: ventilator-associated pneumonia</i></p> <p>* Values weighted based on the distribution of indication reported in <i>Cassini et al.[4]</i></p> <p>The utility value associated with the Other LTO indication is assumed to be equivalent to the cIAI indication</p> |                 |                                            |

1. Ernst EJ, Ernst ME, Hoehns JD, Bergus GR. Women's quality of life is decreased by acute cystitis and antibiotic adverse effects associated with treatment. *Health and Quality of Life Outcomes*. 2005;2005/07/27;3(1):45.
2. Brasel. K BD, Weigelt. J. Cost-utility analysis of contaminated appendectomy wounds. *Journal of The American College of Surgeons*. 1997;184(1):23-30.
3. Beusterien KM, Davies J, Leach M, Meiklejohn D, Grinspan JL, O'Toole A, et al. Population preference values for treatment outcomes in chronic lymphocytic leukaemia: a cross-sectional utility study. *Health and quality of life outcomes*. 2010;8:50-.
4. Cassini A, Högberg LD, Plachouras D, Quattrocchi A, Hoxha A, Simonsen GS, et al. Attributable deaths and disability-adjusted life-years caused by infections with antibiotic-resistant bacteria in the EU and the European Economic Area in 2015: a population-level modelling analysis. *Lancet Infect Dis*. 2019 Jan;19(1):56-66.
